# Supplementary material for: Perspective: hybrid systems combining electrostatic and electrochemical nanostructures for ultrahigh power energy storage
Source: Royal Society of Chemistry journal article supplement (doi:10.1039/c3ee40898a), 2013-01-01
Supplement: c3ee40898a.pdf [file c3ee40898a.pdf]

# Perspective: Hybrid Systems Combining Electrostatic and Electrochemical Nanostructures for Ultrahigh Power Energy Storage

## Supplemental Information

Lauren C. Haspert,<sup>a,b</sup> Eleanor Gillette,<sup>c</sup> Sang Bok Lee<sup>\*c,b,d</sup> and Gary W. Rubloff<sup>\*a,b</sup>

<sup>a</sup> Department of Materials Science and Engineering, University of Maryland, College Park, Maryland 20742, USA.

<sup>b</sup> Institute for Systems Research, University of Maryland, College Park, Maryland 20742, USA.

<sup>c</sup> Department of Chemistry and Biochemistry, University of Maryland, College Park, Maryland 20742, USA. Tel: 301 405 7906; E-mail: [slee@umd.edu](mailto:slee@umd.edu)

<sup>d</sup> School of Nanoscience and Technology (WCU), Korea Advanced Institute of Science and Technology, 335 Gwahangno, Yuseong-gu, Daejeon 305-701, Korea.

Figure SI.1 shows the maximum  $V_{\text{ESC}}$  during the capture stage and  $V_{\text{eq}}$  as a function of  $V_{\text{in}}$  for the same  $C_{\text{ECC}}$  to  $C_{\text{ESC}}$  ratio matrix as shown in Figure 5. The maximum voltage is indicated by the dashed line, above which  $V_{\text{ECC}}(\text{store})$  would be too large and cause electrolytic breakdown.  $V_{\text{ESC}}$  deviates from  $V_{\text{in}}$  when  $C_{\text{ESC}}$  and  $V_{\text{in}}$  is large, i.e.  $C_{\text{ESC}} = 150 \mu\text{F}$  and  $V_{\text{in}} > 4\text{V}$  due to the decreasing nonlinear internal resistance.  $V_{\text{eq}}$  decreases with increasing  $C_{\text{ECC}}$  and  $C_{\text{ESC}}$ . Comparing a single column (same  $C_{\text{ECC}}$ ),  $V_{\text{eq}}$  increases with increasing  $C_{\text{ESC}}$  because  $Q_{\text{ESC}}(\text{capture})$  is larger and more charge transferred results in higher potential across both capacitors. Comparing a single row (same  $C_{\text{ESC}}$ ) where the amount of  $Q_{\text{ECC}}(\text{store})$  is similar,  $V_{\text{eq}}$  must decrease for increasing  $C_{\text{ECC}}$ .

To explain provide a simplified explanation of this concept mathematically, in a circuit where there is no loss the charge in is given by:

$$Q_{in} = C_{ESC} \times V_{ESC} = C_{ESC} \times V_{eq} + C_{ESC} \times V_{eq} \text{ and}$$

Setting both equations for  $Q_{in}$  equal to each other, it is possible to solve for  $V_{eq}$  in terms of the capacitance values and is given by:

$$V_{eq} = V_{ESC} / (1 + C_{ECC}/C_{ESC})$$

Therefore,  $V_{eq}$  must increase with increasing  $C_{ESC}$  and decreasing  $C_{ECC}$ .

For  $C_{ESC} = 150 \mu\text{F}$  and  $C_{ECC} = 40 \mu\text{F}$  (lower left),  $V_{eq}$  rises above the maximum voltage (dashed line) where the voltage would be too large and cause electrolytic breakdown of the ECC. Operating in higher efficiency region (top right, see Figure 5) results in minimal increase in  $V_{eq}$  per pulse and raising the potential across ECC requires multiple pulses for additional capture-transfer-store sequences.

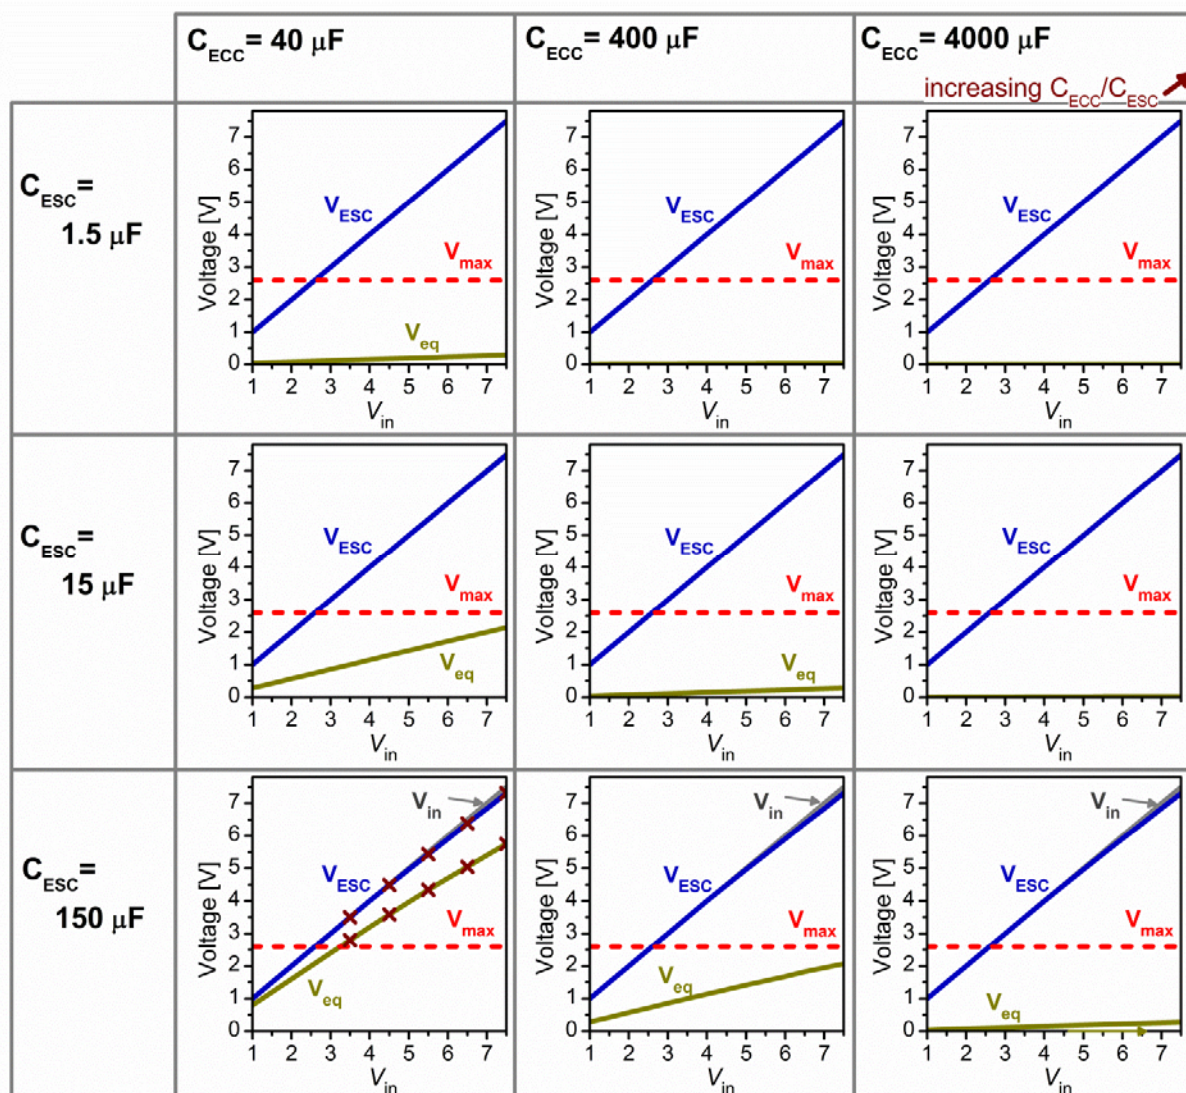

Figure S.I.1. The voltage across fully charged ESC from  $t_2 < t < t_1$  ( $V_{ESC}$ ) and equilibrium voltage after ESC transfers charge to ECC ( $V_{eq}$ ) as a function of  $V_{in}$ .  $V_{max}$  marks the maximum voltage before electrolytic degradation occurs.  $\times$ 's indicate where  $V_{eq} > V_{max}$ . Rows have same  $C_{ESC}$  and columns have same  $C_{ECC}$ .
